# Supplementary material
Source: PubMed Central journal article supplement (PMC5728673)
Supplement: NIHMS920654-supplement.pdf [file NIHMS920654-supplement.pdf]

# Supplemental Figures

Figure S1

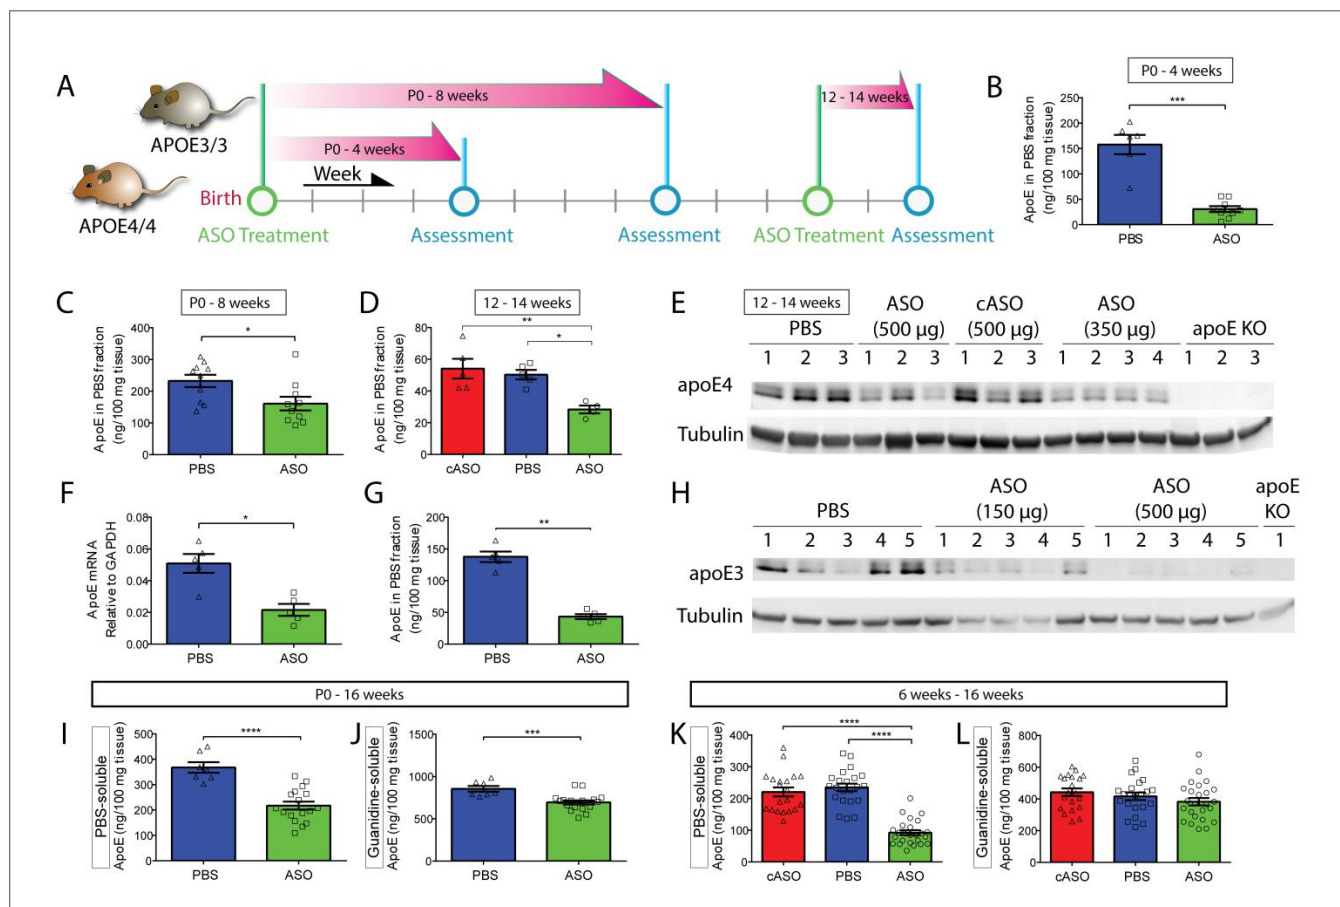

**Figure S1. Related to Figure 1. ASO Treatment effectively reduces expression of apoE3 and apoE4 in mice.**

**(A)** Timeline of various experimental approaches to test for efficacy and optimal dosing of the ASO.

**(B)** APOE4/4 mice were given a single bolus of ASO or PBS at P0 through ICV injection into the right hemisphere, and the PBS-soluble apoE levels in the ipsilateral cortex were assessed at one month of age. (n = 6 – 8 per group, p = 0.0004).

**(C)** A separate cohort of APOE4/4 mice were unilaterally injected with a single bolus of either ASO or PBS at P0, and the apoE levels in the contralateral cortex were assessed at 2 mo through an ELISA. (n = 10 per group, p = 0.0354).

**(D)** PBS, cASO, or ASOs were injected into the right lateral ventricle of  $\epsilon 4/\epsilon 4$  mice at 3 – 4 mo ( $n = 5$  per group) and PBS-soluble apoE levels were measured in brain lysates from the contralateral hippocampus 2 weeks later. ( $p = 0.0049$ ,  $F = 8.963$ ).

**(E)** Western blot analysis of apoE from the same cohort of mice.

**(F)** 10  $\mu$ l of PBS or ASOs at two different concentrations (15 or 50  $\mu$ g/ $\mu$ l) were injected into the right lateral ventricle of APOE3/3 mice at 3 – 4 mo ( $n = 5$  per group) and apoE mRNA level in the ipsilateral posterior cortex was analyzed 2 weeks later. ASO treatment effectively lowered apoE mRNA level in the PBS fraction by more than 50% in the ipsilateral posterior cortex ( $n = 5$  per group,  $p = 0.0159$ ).

**(G)** PBS-soluble ApoE levels were measured using brain lysates from the same region ( $p = 0.0079$ ).

**(H)** Western blot analysis of apoE in the PBS fraction from the ipsilateral posterior cortex brain lysates using anti-apoE antibody HJ15.7. **I,** A cohort of APPE3 mice were unilaterally injected with a bolus of either ASO or PBS at P0, a booster bolus at 2 mo, and the apoE levels in the ipsilateral cortex were assessed at 4 mo ( $n = 7 - 17$  per group,  $p < 0.0001$ ).

**(J)** ApoE levels in the guanidine fraction was measured from the same cohort ( $p = 0.0004$ ).

**(K)** A separate cohort of APPE3 mice were unilaterally injected with a bolus of either cASO, PBS, or ASO starting at 6 weeks of age, a booster bolus at 11 weeks of age, and the apoE levels in the PBS fraction from the contralateral cortex brain lysates were assessed at 4 mo ( $n = 20 - 25$  per group,  $p < 0.0001$ ,  $F = 52.43$ ).

**(L)** ApoE levels in the guanidine fraction were measured from the same cohort ( $p = 0.2099$ ,  $F = 0.600$ ).

\* $p < 0.05$ , \*\* $p < 0.01$ , \*\*\* $p < 0.001$ , \*\*\*\* $p < 0.0001$ . All values are reported as mean  $\pm$  SEM.

Figure S2

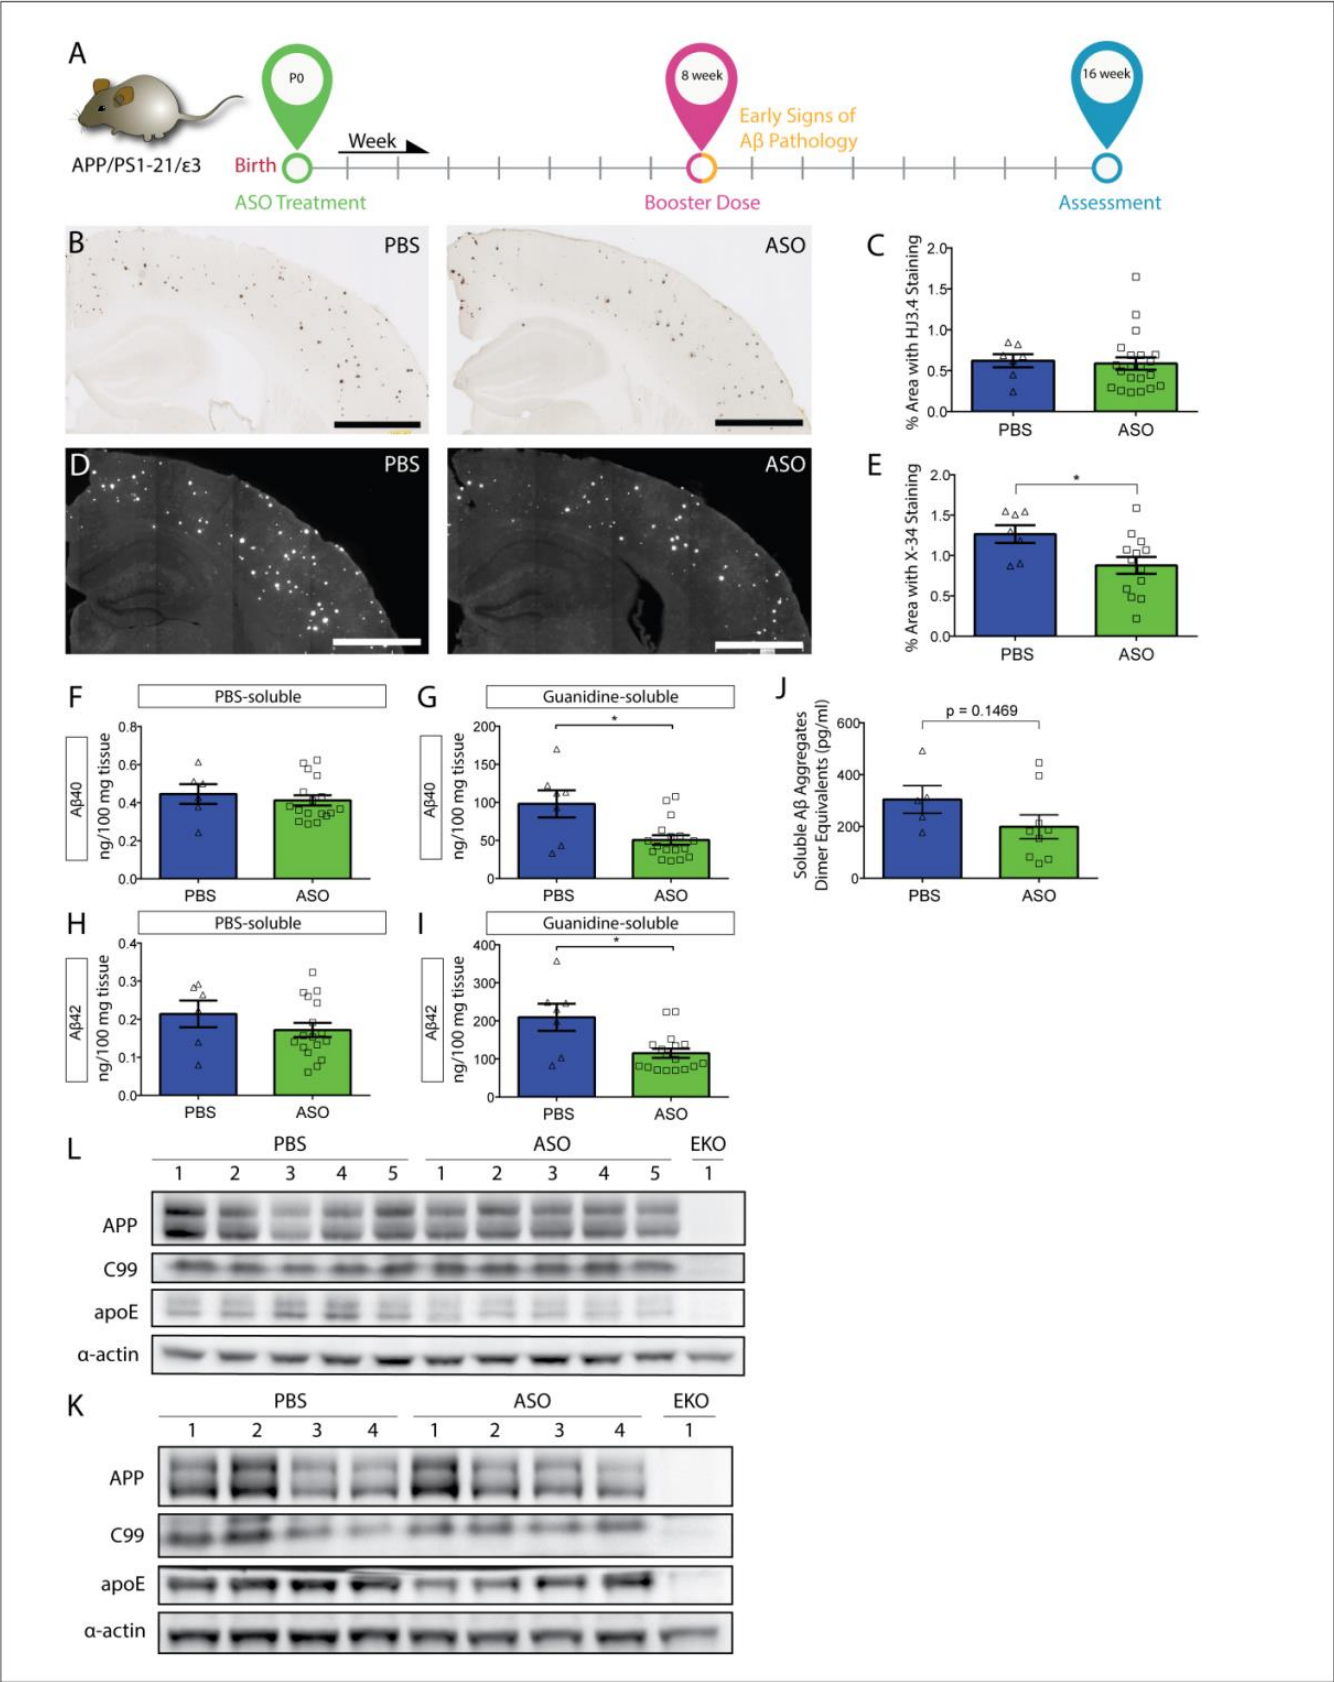

**Figure S2. Related to Figure 2. ASO treatment at P0 significantly reduces insoluble A $\beta$  in APPE3 mice.**

**(A)** Experimental timeline for P0 cohort of APPE3 mice.

**(B, C)** Brain sections from 4-mo APPE3 mice unilaterally injected with PBS or ASO starting at P0 were immunostained for A $\beta$  with anti-A $\beta$  antibody **(B)** and the extent of A $\beta$  deposition was quantified from the ipsilateral cortex **(C)** (Scale bar = 1mm).

**(D, E)** Brain sections from the same cohort of mice were stained with X-34 dye that recognizes only fibrillar plaques and the fibrillar plaque load was quantified from the cortex **(E)** (Scale bar = 1 mm).

**(F, H)** PBS-soluble A $\beta$ <sub>40</sub> **(F)** and A $\beta$ <sub>42</sub> levels **(H)** from the contralateral posterior cortex were measured from the brains of 4-mo APPE3 mice following unilateral treatment with ASO or controls starting at P0 and a booster dose at 2 mo ( $p = 0.4722$  and  $0.3191$ , respectively).

**(G, I)** Guanidine-soluble A $\beta$ <sub>40</sub> **(G)** and A $\beta$ <sub>42</sub> levels **(I)** were measured from the same cohort of mice ( $p = 0.0195$  and  $0.0106$ , respectively).  $n = 9 - 10$  per group.

**(J)** PBS-soluble oligomeric A $\beta$  levels were measured from the PBS-soluble brain lysates ( $n = 5 - 9$  per group,  $p = 0.1469$ ).

**(K)** Western blot analysis of APP, C99, and apoE from PBS-soluble brain homogenates of P0-treated APPE3 mice,  $\alpha$ -actin was used as a loading control. **L**, Similar analyses were done on APPE4 mice. \* $p < 0.05$ . All values are reported as mean  $\pm$  SEM.

Figure S3

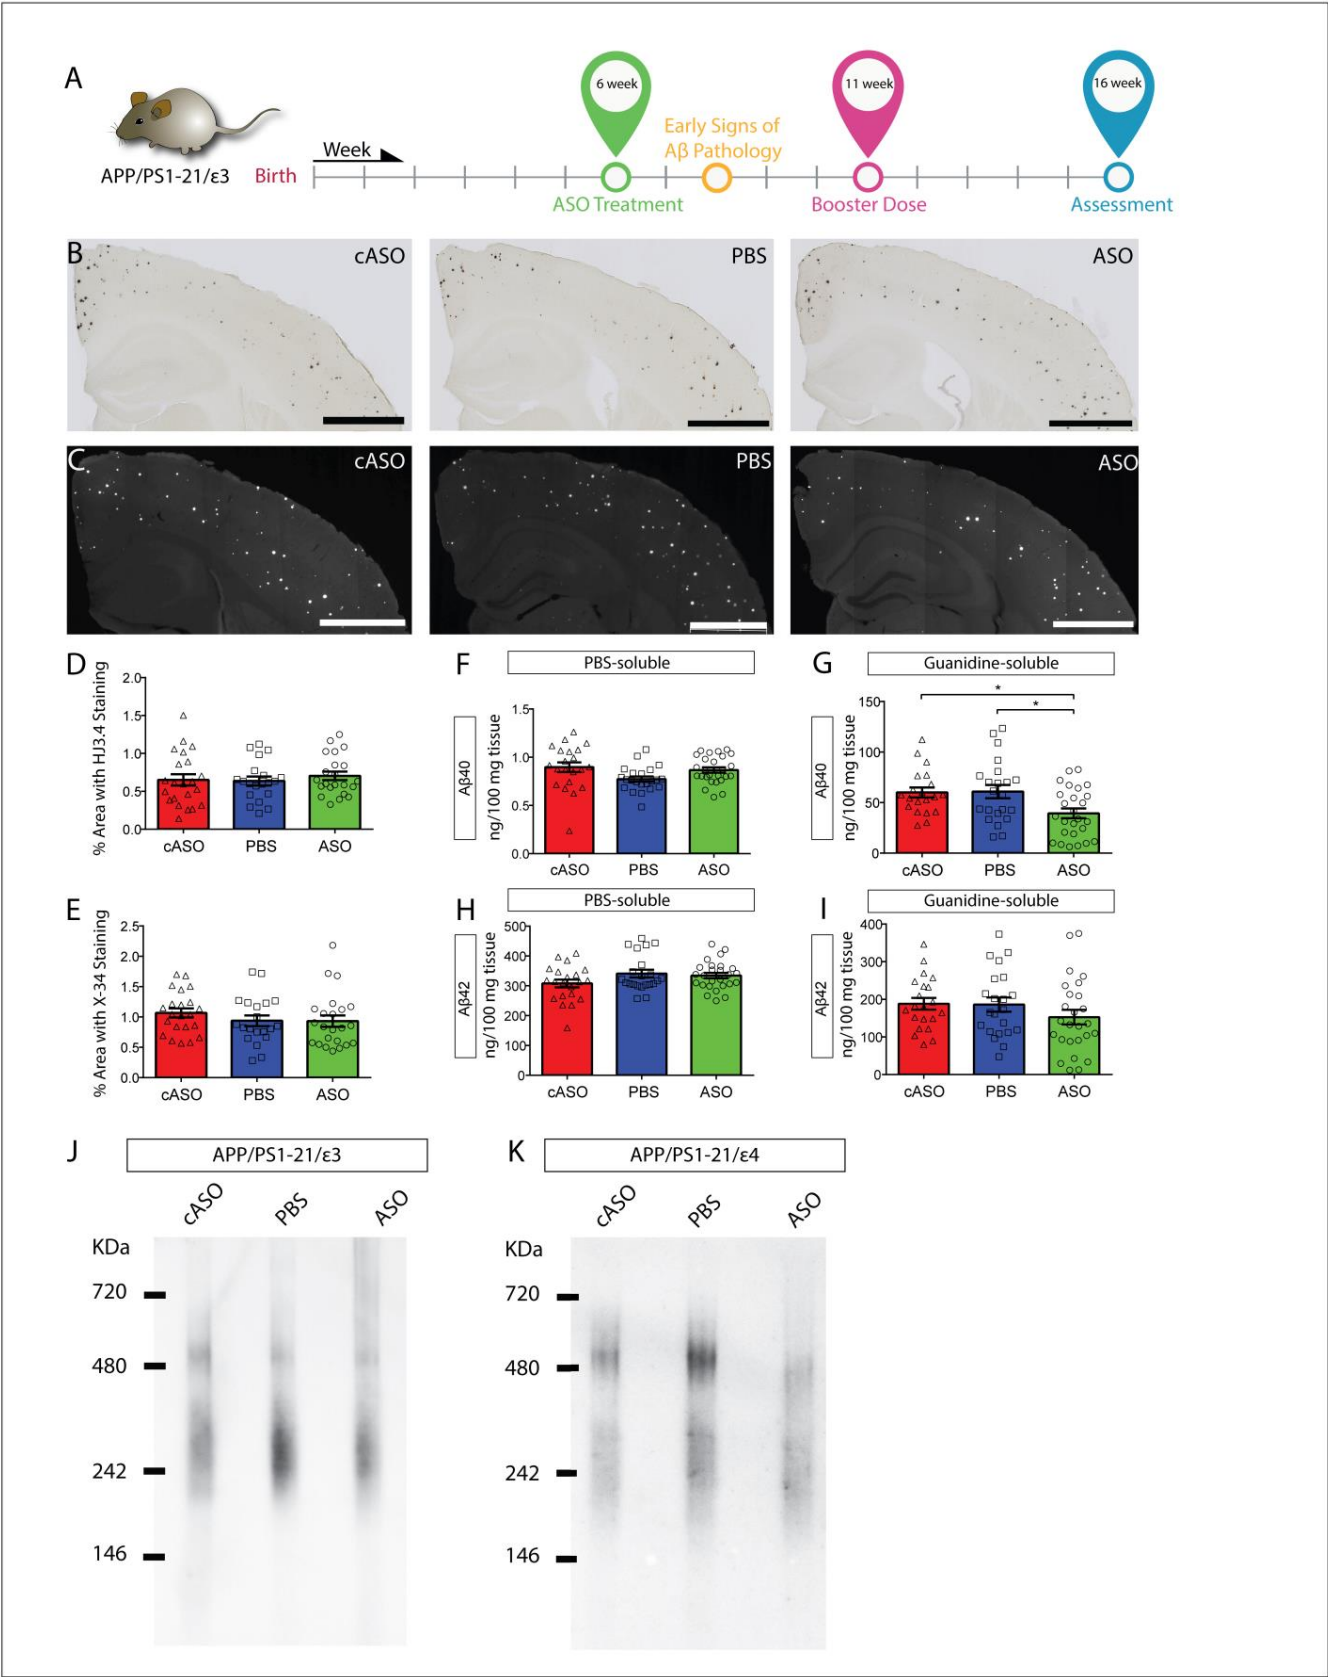

**Figure S3. Related to Figure 3. Reduction of apoE expression starting at 6 weeks of age did not significantly alter total A $\beta$  levels in APPE3 mice.**

**(A)** Experimental timeline for 6wk cohort of APPE3 mice. PBS, cASO, or ASOs were injected into the right lateral ventricle of APPE3 mice starting at 6 weeks of age, and the brains were harvested at 4 mo.

**(B, D)** Brain sections were immunostained with an anti-A $\beta$  antibody **(B)**, and the extent of A $\beta$  deposition was quantified from the ipsilateral cortex **(D)** ( $p = 0.7417$ ,  $F = 0.3003$ ).

**(C, E)** Brain sections from the same cohort of mice were stained with X-34 dye that recognizes only fibrillar plaques **(C)** and the fibrillar plaque load was quantified from the cortex **(E)** ( $p = 0.4559$ ,  $F = 0.7955$ ).

**(F, H)** PBS-soluble A $\beta_{40}$  **(F)** and A $\beta_{42}$  levels **(H)** were measured from the contralateral posterior cortex of the same cohort of mice ( $n = 20 - 25$  per group,  $p = 0.0531$ ,  $F = 3.070$  and  $p = 0.1289$ ,  $F = 2.114$ , respectively).

**(G, I)** Guanidine-soluble A $\beta_{40}$  **(G)** and A $\beta_{42}$  levels **(I)** were measured from the same cohort of mice ( $p = 0.0074$ ,  $F = 5.297$  and  $p = 0.2918$ ,  $F = 1.255$ , respectively).

**(J)** Native gel analysis of CSF samples from APPE3 mice treated with either cASO, PBS, or ASO.

**(K)** Similar analyses were done on CSF samples from APPE4 mice. \* $p < 0.05$ . Scale bars = 1 mm. All values are reported as mean  $\pm$  SEM.

Figure S4

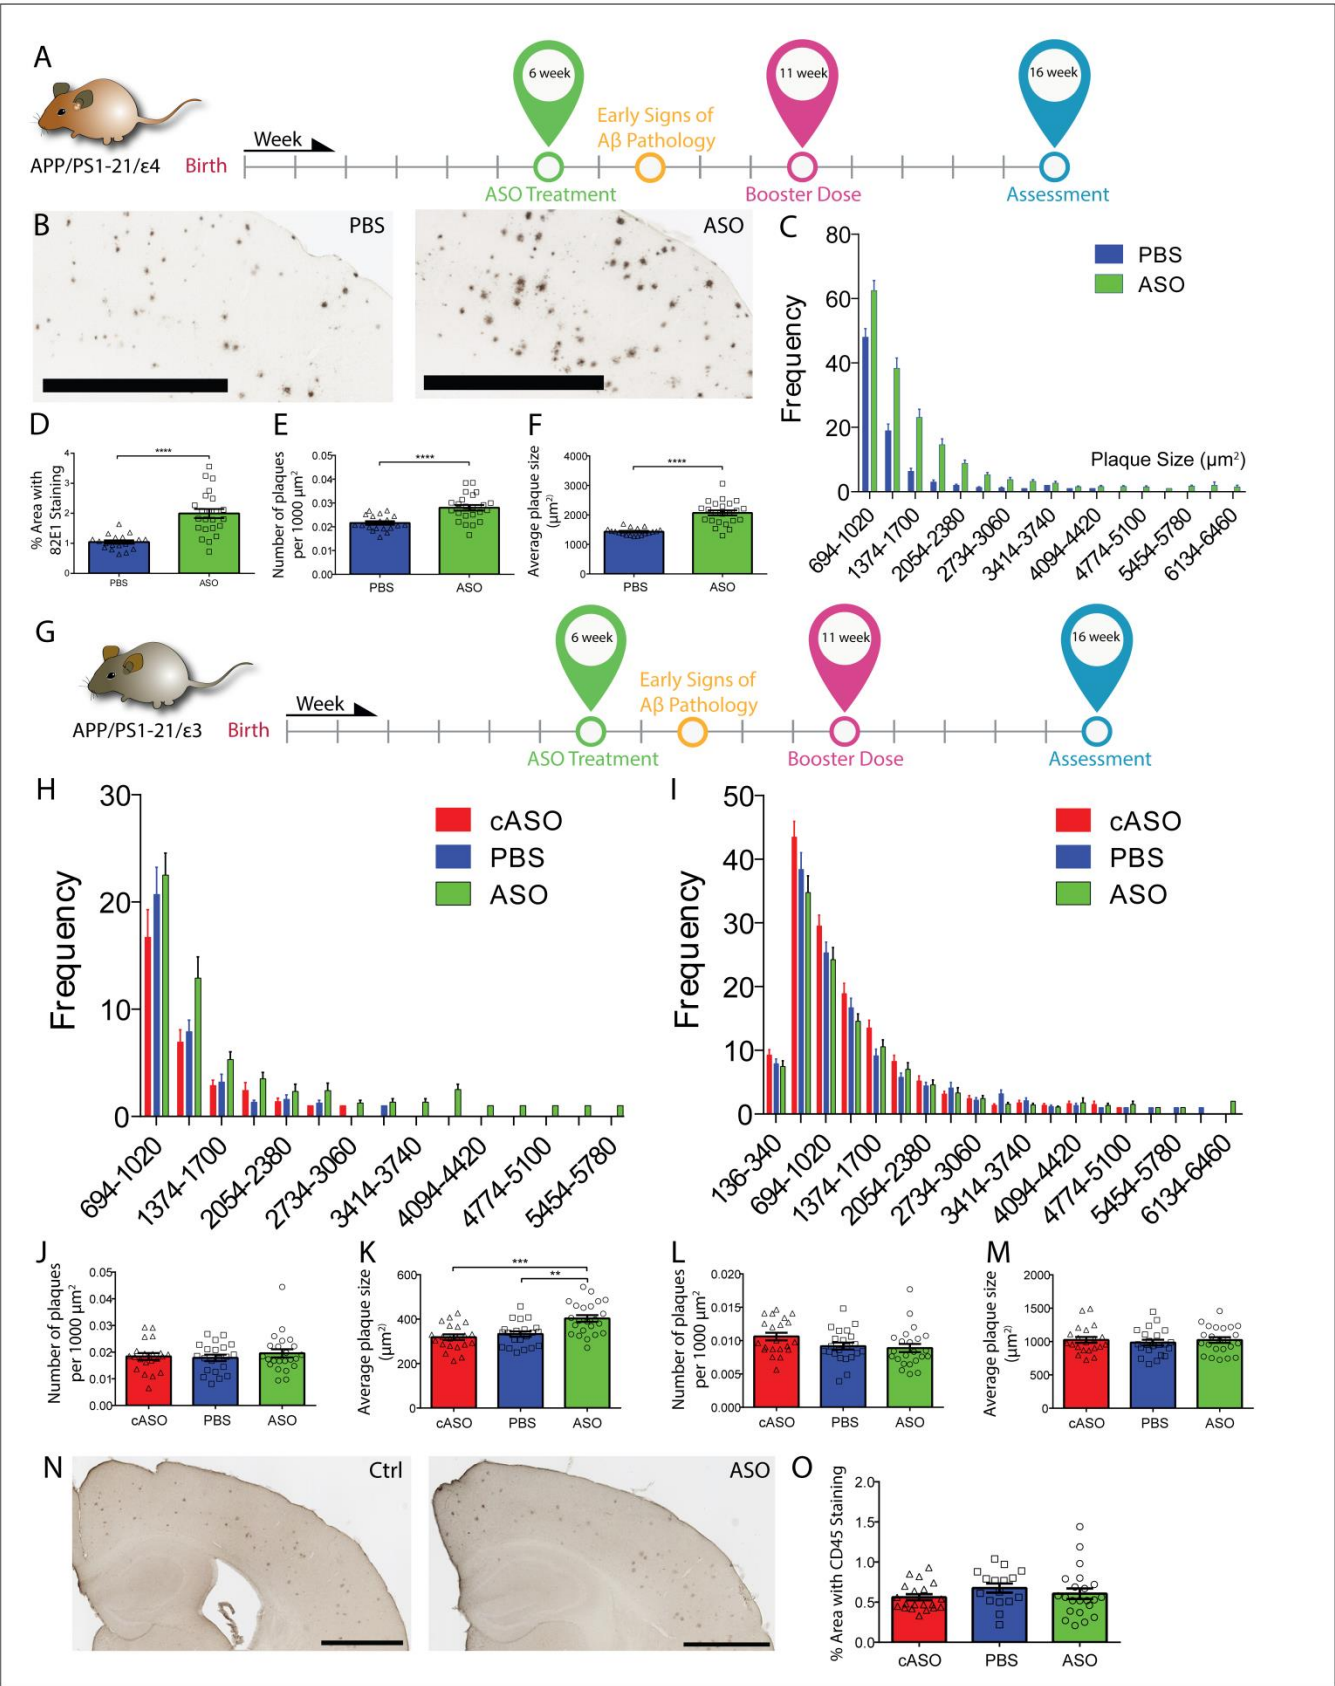

**Figure S4. Related to Figure 4. ASO treatment significantly alters plaque distribution in APPE4 mice.**

**(A)** Experimental timeline for 6wk cohort of APPE4 mice.

**(B)** Brain sections from APPE4 mice treated with either PBS or ASO stained with anti-A $\beta$  antibody 82E1 are shown (Scale bars = 1 mm).

**(C, D)** Analysis of the plaque distribution was done by stratifying total plaque coverage based on size, and the frequency of occurrence was plotted on the Y-axis **(C)**. Three brain sections, 300  $\mu$ m apart, from each mouse are included in the analysis, and only plaques larger than 694  $\mu$ m<sup>2</sup> are shown for clarity. The extent of A $\beta$  deposition was quantified from the ipsilateral cortex as percent coverage **(D)**.

**(E, F)** The density of A $\beta$  antibody-stained plaques **(E)** and average plaque size **(F)** was analyzed in the same cohort of mice ( $n = 20 - 25$  per group,  $p < 0.0001$  and  $p < 0.0001$ , respectively).

**(G)** Experimental timeline for 6wk cohort of APPE3 mice.

**(H)** Brain sections from APPE3 mice treated with either ASO or controls starting at 6 weeks of age were stained with anti-A $\beta$  antibody HJ3.4 and the plaque size distribution was analyzed by stratifying the total plaque coverage based on individual plaque size. The frequency distribution of only plaques larger than 694  $\mu$ m<sup>2</sup> are shown for clarity. Three sections, 300  $\mu$ m apart, from each mouse was included in the analysis. A two-sample K-S test was used to compare the frequency of cumulative distribution of plaque sizes between the groups, and significant differences were found between cASO and ASO groups ( $p = 1.0614\text{E-}10$ ), as well as between PBS and ASO groups ( $p = 2.1456\text{E-}05$ ), but not between the cASO and PBS groups ( $p = 0.05507$ ).

**(I)** Analysis of the plaque size distribution was done on brain sections from the same cohort of mice stained with X-34 dye using a similar approach as in **(H)**. A two-sample K-S test was used to compare the frequency of cumulative distribution of plaque sizes between the groups, and a significant shift in plaque size distribution were found between the ASO and PBS groups ( $p = 0.03457$ ), but not between the ASO and cASO groups ( $p = 0.94044$ ) or between the cASO and PBS groups ( $p = 0.20289$ ).

**(J, K)** The density of A $\beta$  antibody-stained plaques **(J)** and average plaque size **(K)** were analyzed in the same cohort of mice (n = 20 – 25 per group, p = 0.6544, F = 0.4269 and p < 0.0001, F = 11.55, respectively).

**(L, M)** The density of X-34-stained plaques **(L)** and average plaque size **(M)** were analyzed in the same cohort of mice (n = 20 – 25 per group, p = 0.0866, F = 2.544 and p = 0.7580, F = 0.2783, respectively).

**(N, O)** Brain sections from the same cohort of APPE3 mice were immunostained with an antibody to CD45 that identifies activated microglia (Scale bars = 1 mm). Due to space constraints, only the representative images of cASO and ASO treatment groups were shown. There was no statistical significance between the PBS and cASO treatment groups. **(O)** The percentage of areas covered by CD45 staining was quantified from the ipsilateral cortex of APPE3 mice (n = 20 – 25 per group, p = 0.3777, F = 0.9912). \*\*p < 0.01, \*\*\*p < 0.001, \*\*\*\*p < 0.0001. All values are reported as mean  $\pm$  SEM.
